# Supplementary material for: In situ deposition of MOF199 onto hierarchical structures of bamboo and wood and their antibacterial properties
Source: Royal Society of Chemistry journal article supplement (doi:10.1039/c9ra07046j), 2019-01-01
Supplement: c9ra07046j1.pdf [file c9ra07046j1.pdf]

## Supplementary information

### In Situ Deposition of MOF199 onto Hierarchical Structure of Bamboo and Wood and Their Antibacterial Properties

Minglei Su,<sup>a</sup> Rong Zhang,<sup>a\*</sup> Huairui Li,<sup>a</sup> Xiaobei Jin,<sup>a</sup> Jingpeng Li,<sup>b</sup> Xianfeng Yue,<sup>a</sup> Daochun Qin<sup>a</sup>

<sup>a</sup> International Centre for Bamboo and Rattan, Beijing 100102, PR China

<sup>b</sup> China National Bamboo Research Centre, Hangzhou 310012, PR China.

Fig.S1 XRD spectra of “6-13°” of (a)Bamboo@MOF2 and bamboo, (b) Wood@MOF2 and Wood.

Fig.S2 EDS spectra of original (a) Bamboo and (b) Wood.

Fig.S3 Photographs of the antibacterial test results of the Bamboo@MOF and Wood@MOF against (a) *E. coli* and (b) *S. aureus*. The resulting bacterial growth can be observed in each plate after 24 hours incubation.

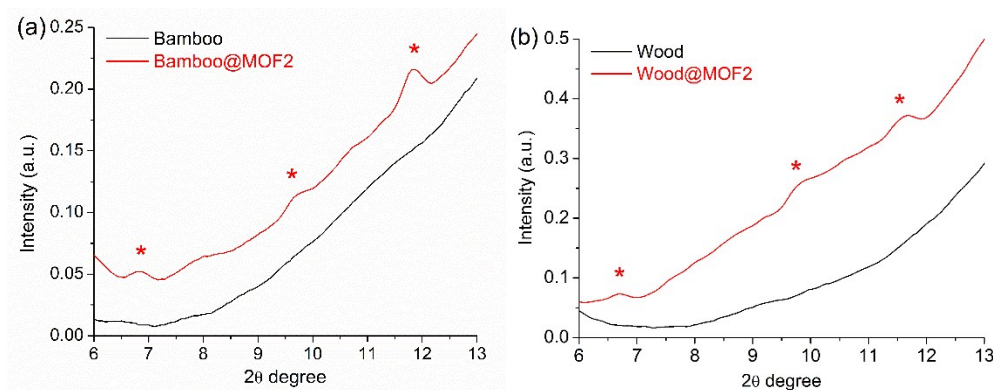

Fig.S1 XRD spectra of “6-13°” of (a)Bamboo@MOF2 and bamboo, (b) Wood@MOF2 and Wood.

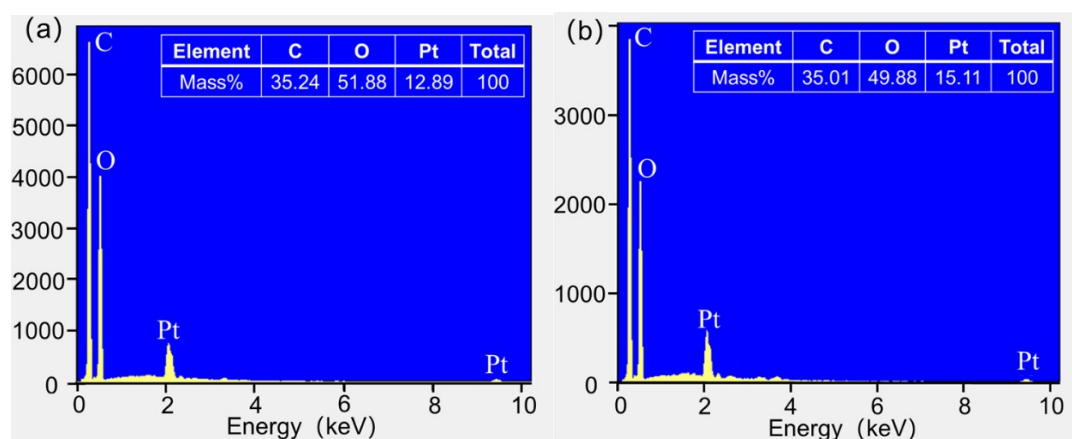

Fig.S2 EDS spectra of original (a) Bamboo and (b) Wood.

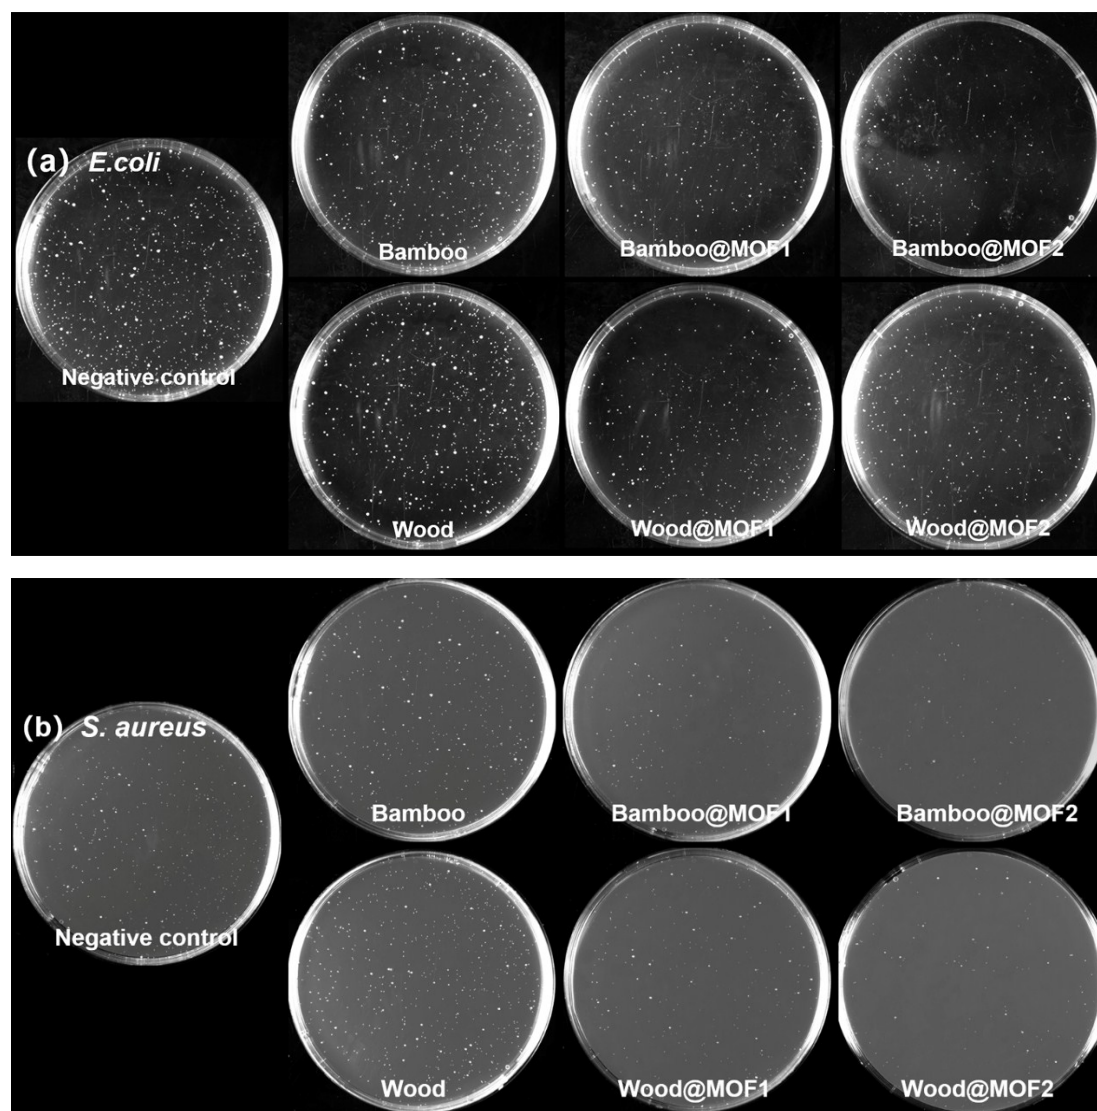

Fig.S3 Photographs of the antibacterial test results of the Bamboo@MOF and Wood@MOF against (a) *E. coli* and (b) *S. aureus*. The resulting bacterial growth can be observed in each plate after 24 hours incubation.
